1 **Title:** *Manduca sexta* experience high parasitoid pressures in the field but minor fitness costs of  
2 consuming plant secondary compounds

3 **Abstract**

- 4 1. Plant-herbivore co-evolutionary interactions have led to a range of plant defenses that  
5 minimize insect damage and a suite of counter-adaptations that allow herbivores to feed  
6 on defended plants. Consuming plant secondary compounds results in herbivore growth  
7 and developmental costs but can have beneficial effects such as deterrence or harm of  
8 parasitoid enemies. Therefore, the role of secondary compounds on herbivore fitness  
9 must be considered in the context of the abundance and level of harm from natural  
10 enemies and the costs herbivores incur feeding on plant secondary compounds.
- 11 2. In this study, I combined field measurements of *Cotesia congregata* wasp parasitism  
12 pressure with detailed measurements of the costs of plant secondary compounds across  
13 developmental stages in the herbivore host, *Manduca sexta*.
- 14 3. I show that *C. congregata* parasitoids exert large negative selective pressures, killing 31-  
15 57% of *M. sexta* larvae in the field. *Manduca sexta* developed fastest during instars most  
16 at risk for parasitoid oviposition but growth was slowed by consumption of plant  
17 secondary compounds. The negative effects of consuming plant secondary compounds as  
18 larvae influenced adult size traits but there were no immune, survival, or fecundity costs.
- 19 4. These results suggest that developmental costs experienced by *M. sexta* herbivores  
20 consuming defensive compounds are minor in comparison to the strong negative survival  
21 pressures from abundant parasitoid enemies.

22 **Keywords:** growth, herbivore, immune, *Manduca*, parasitoid, plant secondary compound

23

## 24 **Introduction**

25           Coevolution between herbivorous insects and their host plants often mitigates their  
26 reciprocal (negative) fitness effects, resulting in rapid evolution of plant anti-herbivore defense  
27 and insect counter-adaptations to these defenses (Ehrlich and Raven 1964, Maron *et al.* 2019).  
28 Plants produce combinations of physical and chemical defenses that may lower herbivore fitness  
29 by reducing growth, disrupting development, decreasing survival, and/or attracting natural  
30 enemies of herbivores (Price *et al.* 1980, Howe and Jander 2008, Furstenberg-Hagg *et al.* 2013).  
31 Herbivores feeding on defended plants may experience immediate or delayed effects of  
32 consuming secondary compounds and these consequences may extend past the life stage at  
33 which the stress was experienced (Fellous and Lazzaro 2010, van Dam *et al.* 2011).  
34 Understanding how insect herbivores evolve to feed on defended plants requires quantifying the  
35 fitness effects of plant defenses across herbivore life stages and examining the conditions under  
36 which consumption of plant secondary compounds is beneficial to herbivores. An important  
37 component of estimating these fitness consequences is to determine how additional stressors,  
38 such as natural enemies, affect herbivore fitness in conjunction with plant defense.

39           One way that herbivores mitigate the negative consequences of plant defense is if  
40 consumption of these secondary compounds directly or indirectly harms natural enemies. Insects  
41 are predicted to consume defended plants despite the apparent negative effects if the anti-enemy  
42 benefit of consuming plant secondary compounds outweighs the costs. Enemies can exert a large  
43 negative selective pressure on their targets when the enemies are at high abundance and/or when  
44 they drastically decrease herbivore fitness (Hassell and Waage 1984). Parasitoids, for instance,  
45 have an especially negative fitness effect because they kill their host at an immature (pre-  
46 reproductive) stage and reduce host fitness to zero (Godfray 1994). Endoparasitoids—those that

47 develop inside the body of their hosts--are common enemies of lepidopteran species and  
48 endoparasitoid fitness may be particularly affected by host quality (Eggleton and Belshaw 1992).  
49 In insect hosts that sequester secondary compounds, there is clear co-option of plant toxins for  
50 herbivore anti-enemy defense but sequestration is considered more effective against predators  
51 rather than parasitoids because of the trade-off between chemical sequestration and immune  
52 function needed to defend against parasitoid eggs (Gauld *et al.* 1992, Smilanich *et al.* 2009).

53 In herbivore hosts that do not sequester plant secondary compounds, such as *Manduca*  
54 *sexta*, plant defenses can still reduce endoparasitoid success on hosts fed secondary compounds,  
55 either through direct toxicity to parasitoids or indirect effects on host quality (Beckage and  
56 Riddiford 1978, Thorpe and Barbosa 1986, Barbosa *et al.* 1991; Harvey *et al.* 2007).

57 Endoparasitoids may come into contact with the toxic compounds their herbivore hosts consume  
58 as these compounds are detoxified or excreted from the host (Wink and Theile 2002, Kumar *et*  
59 *al.* 2014). Endoparasitoids are also sensitive to the indirect effects of secondary compounds on  
60 host growth, survival, and immune function (Parr and Thurston 1972, Price *et al.* 1980, Barbosa  
61 *et al.* 1991, Appel and Martin 1992, Stamp 1993, Alleyne and Beckage 1997, Ode 2006,  
62 Bukovinsky *et al.* 2009, Thaler *et al.* 2012, D'Incao *et al.* 2012). One host immune response in  
63 particular, the encapsulation and melanization of parasitoid eggs, can decrease parasitoid egg  
64 hatching success but whether this response is increased or hindered by secondary compounds is  
65 hard to predict given current evidence (Kraaijeveld *et al.* 2001, Bukovinszky *et al.* 2009,  
66 Smilanich *et al.* 2009).

67 Disentangling the effects of secondary compounds and their impacts on herbivore  
68 immune function and growth is necessary to determine how secondary compounds alter  
69 herbivore health and interactions between herbivores and parasitoids. Secondary compounds

70 may prime the insect's immune response to allow the insect to better respond to subsequent  
71 stress, such as parasitoid attack, or (alternatively) insect immunity may suffer as a result of  
72 eating defended plant tissues (Fellous and Lazzaro 2010). The impact of secondary compounds  
73 on herbivore immune function must be interpreted in the context of larval growth since limited  
74 resources are predicted to result in a trade-off between growth and immunity (Ode 2006,  
75 Bascunan-Garcia *et al.* 2010; van der Most *et al.* 2011, Wilson *et al.* 2019). The effects of  
76 secondary compounds may also be more pronounced at specific herbivore developmental stages.  
77 Studies that measure overall increases in time from hatching to pupation or short-term decreases  
78 in growth rate do not fully capture whether these developmental changes alter herbivore fitness  
79 or exposure to parasitoids (e.g. Parr and Thurston 1972, Granzow *et al.* 1985, Barbosa *et al.*  
80 1991, Harvey *et al.* 2007, but see Van Dam *et al.* 2001).

81         Whether larval consumption of secondary compounds influences herbivore fitness  
82 depends in part on if stress experienced at the larval stage impacts adult mating and reproductive  
83 traits in addition to survival to adulthood (Bessin and Reagan 1990, Spurgeon *et al.* 1995). The  
84 effect of larval experience on reproductive fitness may differ based on insect life histories and  
85 developmental patterns. Larval experience has been shown to impact adult traits in non-  
86 holometabolous insects (Hopkins 1917, Corbet 1985), but has received less attention in insects  
87 that undergo metamorphosis because pupation is often thought of as a re-setting period that can  
88 erase larval experiences (Barron 2001, Fellous and Lazzaro 2010). However, pupal size and adult  
89 fecundity are correlated in some lepidopteran species, indicating that larval are not always  
90 negated by the restructuring that occurs during pupation and larval resource acquisition can  
91 affect adult traits (Bessin and Reagan 1990, Spurgeon *et al.* 1995, Kariyat and Portman 2016).  
92 Therefore, quantifying the impacts of larval stress on adult morphological and behavioral traits is

93 necessary to determine if there are lasting effects of plant defense on adult mating and fitness  
94 traits or if larval consumption of secondary compounds simply alters survival to adulthood but  
95 the surviving adults are unaffected by larval stress.

96 In this study, I use the herbivore *Manduca sexta* (Lepidoptera: Sphingidae) to determine  
97 the fitness costs posed by natural enemies and the costs of larval consumption of chemically  
98 defended plants on herbivore immunity, development, survival, and adult fitness traits. By  
99 collecting and monitoring *M. sexta* from a field population, I establish that *Cotesia congregata*  
100 parasitoids exert large negative survival costs on larval *M. sexta*. Because the anti-parasitoid  
101 benefits of consuming host plants high in secondary compounds could outweigh mild negative  
102 developmental effects on herbivores, I also quantified the fitness effects of plant secondary  
103 compounds in field-collected and lab colonies of *M. sexta*. I show that while two different types  
104 of secondary compounds (inducible nicotine and constitutive rutin) affect *M. sexta* larval and  
105 adult size and morphological traits, they do not have strong negative effects on survival to  
106 adulthood, immune responses to artificial parasitoids, or adult fecundity. Because nicotine is  
107 known to have protective effects against *C. congregata* parasitoids (Beckage and Riddiford  
108 1978, Thorpe and Barbosa 1986, Barbosa *et al.* 1991, Harvey *et al.* 2007), these results suggest  
109 that the developmental costs experienced by *M. sexta* consuming defensive compounds may be  
110 minor in comparison to the harm from abundant enemy pressures.

## 111 **Materials and Methods**

### 112 Study system: *Manduca sexta* and *Cotesia congregata*

113 *Manduca sexta* are ecologically and economically important pollinators and herbivores of  
114 Solanaceous plants. While feeding on host plants, *M. sexta* larvae are targeted by natural  
115 enemies, including *Braconid* wasp and *Tachinid* fly parasitoids that lay eggs inside their hosts

116 (Yamamoto and Fraenkel 1960, Stireman *et al.* 2006, Garvey *et al.* 2020). *Cotesia congregata*  
117 parasitoid eggs hatch and feed inside the *M. sexta* host larvae before they emerge from the host  
118 larval cuticle to pupate, ultimately killing the host (Alleyne and Beckage 1997). Prior studies  
119 have shown that consumption of plant secondary compounds by larvae of *M. sexta* can be  
120 protective against parasitoids by deterring parasitoid oviposition and harming parasitoid  
121 development (Beckage and Riddiford 1978, Thorpe and Barbosa 1986, Barbosa *et al.* 1991;  
122 Harvey *et al.* 2007).

### 123 Field collection of *M. sexta* larvae

124 *Manduca sexta* larvae were collected from leaves of dark tobacco (*Nicotiana tabacum*) at  
125 the University of Kentucky Research and Education Center (Princeton, KY) to determine  
126 parasitoid abundance and establish a field-collected colony for experiments testing the effects of  
127 secondary compounds on *M. sexta*. The 4.5-acre field area contained ~4900 dark tobacco  
128 plants/acre, with a cured leaf content of approximately 3-5% nicotine (Dr. Andrew Bailey,  
129 personal communication). Over three field collection dates all larvae found in the field were  
130 collected, for a total of 395 *M. sexta* larvae ranging from second to fifth/sixth instar collected (21  
131 July 2013 N = 98; 20 August 2013 N = 156; 28 July 2014 N = 141). These dates were timed to  
132 occur after the residual insecticide used in transplanting (late May-early June) wore off and  
133 before application of additional pesticides.

### 134 Measurements of parasitoid abundance on field *M. sexta*

135 After each of the three field collections, *M. sexta* larvae were brought back to the lab and  
136 monitored twice daily for parasitoid emergence. Because *M. sexta* consume a large amount of  
137 leaf tissue, field-collected larvae were transitioned to an artificial wheat germ-based diet with 10-

138 20% wet volume of Solanaceous leaf tissue added to facilitate diet acceptance (SI Table 1).  
139 Larvae were fed *ad libitum* under 14:10 light:day cycles at 22.2±0.5 °C (Bell *et al.* 1975).  
140 Parasitoid development takes a predictable number of days, meaning that the time between field  
141 collection and parasitoid emergence can be used to estimate the instar at which parasitoid  
142 oviposition occurred (Gilmore 1938). In July 2014, I recorded the approximate instar at field  
143 collection and determined the time it took parasitoids to emergence from different host instars.

144 Chi-squared tests were used to test for variation in the proportion of *M. sexta* larvae with  
145 parasitoids among the three field collection dates. Parasitoid load and number of days post-field  
146 collection until *C. congregata* emergence were compared for larvae collected from the field at  
147 different instars using Poisson general linear models (GLM) (R v. 3.2.2; R Core Team 2014).  
148 Robust standard errors were used as Breusch-Pagan tests showed heteroskedasticity (bptest() in  
149 LMTEST; Zeileis and Hothorn 2002). Instar five was excluded from instar-specific models  
150 because I collected only two fifth instars.

#### 151 Rearing of *Manduca sexta* field-collected and lab colonies

152 Because laboratory and natural populations of *M. sexta* have been shown to have  
153 different evolutionary histories and responses to stressful conditions (Kingsolver 2007, Diamond  
154 *et al.* 2010, Kingsolver *et al.* 2020), I used the surviving *M. sexta* from the 2014 field collection  
155 to establish a field-collected colony to use alongside the standard lab colony to test the effects of  
156 secondary compounds on herbivore growth and fitness (Supplementary Methods 1). The lab  
157 colony was derived from a colony maintained under solely laboratory conditions (artificial diet,  
158 no introduction of wild individuals) for >250 generations since the 1960s (Carolina Biological  
159 Supply, Kingsolver *et al.* 2009). Field-collected and lab colonies were kept in separate cages in

160 the same greenhouse. Prior to experiments, the field-collected colony was reared through a  
161 generation on solely artificial diet to control for maternal effects.

#### 162 Preparation of *M. sexta* diets with secondary compounds

163 Using artificial diets containing either nicotine or rutin (SI Table 1), I tested the effects of  
164 secondary compounds on *M. sexta* development and fitness traits. As a specialist herbivore, *M.*  
165 *sexta* often feed on leaves containing nicotine, a pyridine alkaloid found only in the Solanaceae  
166 plant family, which serves as a defensive chemical against herbivory and can be induced via the  
167 jasmonic acid pathway (Keinanen *et al.* 2001, Steppuhn *et al.* 2004). I used 0.5% wet weight  
168 nicotine, which represents a high but relevant concentration that larvae feeding on tobacco would  
169 encounter (Parr and Thurston 1972, Saitoh *et al.* 1985, Sisson and Saunders 1982, Sisson and  
170 Saunders 1983, Thompson and Redak 2007). To test whether herbivore responses to plant  
171 defensive chemicals are consistent across different compounds, I also tested the effects of 0.5%  
172 rutin (quercetin 3-rhamnoglucoside) on the same herbivore traits. Rutin is found in 32 plant  
173 families and is constitutively present at 0.008- 0.61% wet mass in tobacco (Krewson and  
174 Naghski 1953, Keinanen *et al.* 2001, Kessler and Baldwin 2004). *Manduca sexta* used for the  
175 immunity, growth, and adult measurements were fed artificial diet (control, 0.5% nicotine, or  
176 0.5% rutin depending on treatment) *ad libitum*.

#### 177 *M. sexta* larval immune responses to artificial parasitoids

178 Injections of artificial parasitoid eggs into *M. sexta* larvae were used to test whether  
179 secondary compounds alter host immune responses and if growth and immunity trade off.  
180 *Manduca sexta* from both colonies were collected concurrently as neonate larvae and reared  
181 individually on 0.5% nicotine, 0.5% rutin, or control diets until the fourth instar (N = 27-30 per  
182 diet treatment for the lab colony and N = 16-20 per diet treatment for the field-collected colony).



183 Fourth-instar larvae were used for injections because larvae are large enough to manipulate  
184 without causing death (Beetz *et al.* 2008). Forceps were used to insert an artificial parasitoid egg  
185 (a 2 mm-long piece of roughened nylon filament) through a needle hole pricked behind the  
186 fourth proleg as in Piesk *et al.* (2013). Larvae were returned to their respective diets and fed  
187 readily after egg insertion. Pre-challenge growth rate was calculated as  $\ln(\text{larval mass at fourth}$   
188  $\text{instar})/\text{number of days from hatching to fourth instar}$ . Post-challenge growth rate was calculated  
189 as  $\ln(\text{larval mass 24 hours post egg insertion}/\text{larval mass at time of egg insertion})$  (Diamond and  
190 Kingsolver 2011).

191         After the final weighing, larvae were frozen at  $-20^{\circ}\text{C}$  for dissections to quantify the  
192 strength of the immune response to the artificial parasitoid. Melanization (dark buildup by  
193 hemocyte immune cells) was photographed using a Leica M205FA Stereo microscope and the  
194 percent melanized was calculated using ImageJ (Diamond and Kingsolver 2011). Percent  
195 melanized was used for GLM with robust standard errors to determine whether immune  
196 responses differed based on secondary compounds, prior condition (pre-challenge growth rate),  
197 or trade-offs between post-challenge growth rate and melanization. Pairwise interactions  
198 between diet-colony and diet-growth rates were non-significant ( $P > 0.1$  for all) and were  
199 removed from the model. Area melanized was transformed for non-normality using Box-Cox  
200 lambda power transformations after scaling of non-positive values (BC = 0.1; `boxcox()` in  
201 MASS; Box and Cox 1964).

#### 202 *M. sexta* larval and pupal traits on nicotine and rutin diets

203         Because of the large numbers of *M. sexta* needed, the effects of nicotine and rutin on  
204 growth and fitness traits were tested and analyzed at separate generations. Larvae from both  
205 colonies were fed control or experimental diets (0.5% nicotine or 0.5% rutin) and monitored

206 daily for molting and the number of days per larval instar ( $N = 80$  per diet treatment and colony).  
207 The total number of larval instars was recorded because larvae undergo either five or six instars  
208 depending on size (Kingsolver 2007) (SI Table 2). Poisson GLM and Wald tests were used to  
209 test for variability in the number of days per instar and whether any instar was more sensitive to  
210 the effects of nicotine or rutin (`wald.test()` in AOD; Lesnoff and Lancelot, 2012). Non-significant  
211 interactions ( $P > 0.1$ ) between instar and nicotine or rutin were removed.

212 I recorded the number of days to pupation and pupal mass for *M. sexta* males and females  
213 to test whether larval consumption of nicotine or rutin altered pupal traits. Poisson GLM was  
214 used to determine if nicotine or rutin extended the number of days to reach pupation. ANOVA  
215 with type III sums-of-squares was used to test for differences in pupal size mass based on  
216 secondary compounds or sex and whether the effects of nicotine or rutin were stronger for either  
217 sex (diet\*sex interaction) (`Anova()` in CAR; Fox and Weisberg 2011). Pupal mass for lab moths  
218 in the rutin experiment was transformed by  $BC = 2$ . One-sided Fisher tests (`fisher.test()`) were  
219 used to test if secondary compounds increased larval and pupal deformities.

#### 220 *M. sexta* adult size and fitness traits

221 To test if larval consumption of secondary compounds resulted in size differences post-  
222 pupation, surviving adults were frozen at  $-20^{\circ}\text{C}$  the morning post-eclosion to measure adult body  
223 and wing length. Kaplan-Meier survival analyses were used to determine if either secondary  
224 compound reduced moth survival to eclosion (`survdiff()` in SURVIVAL; Therneau and  
225 Grambsch 2000, Therneau 2015). ANOVA models for adult body and wing length included diet,  
226 sex, and a diet\* sex interaction. Wing length was transformed by  $BC = 6$  for moths in the lab  
227 colony.

228 Fecundity estimates were obtained by dissecting ovarioles from adult females and  
229 counting follicle numbers under a dissecting scope as in Diamond *et al.* 2010 (N = 25-30 per diet  
230 treatment for the lab colony and N = 8-25 per diet treatment for the field-collected colony).  
231 Because larger moths may produce more eggs, the ratio of follicles to body area was used as the  
232 dependent variable in ANOVA models testing for an effect of larval consumption of secondary  
233 compounds on fecundity. Follicles/body area was calculated as: (number of follicles in a female  
234 moth) / ( $\frac{1}{2}$  body length x  $\frac{1}{2}$  body width x 3.14). Correlations among adult traits are shown in SI  
235 Table 3.

#### 236 *M. sexta* larval dietary choice trials

237 Binary choice trials were used to determine if neonate *M. sexta* exhibit a preference for  
238 artificial diets with or without secondary compounds. Neonate larvae from both colonies were  
239 collected within three hours of hatching and placed in the center of individual 9 cm diameter  
240 petri dishes with 1 cm<sup>2</sup> pieces of control diet and experimental diet (0.5% nicotine or 0.5% rutin)  
241 placed on opposite sides. Dishes were oriented haphazardly under 14:10 dark:light conditions  
242 and monitored at 1, 6, and 24 hours before scoring contact with either diet at 48 hours as a  
243 choice. Larvae did not leave or switch once choosing a diet. Chi-Squared analyses were used to  
244 test if control or experimental diets were chosen significantly more than half the time. Larvae  
245 that did not choose in 48 hours (field N = 11/60 and lab N = 3/76) were excluded.

246

## 247 **Results**

### 248 *Cotesia congregata* parasitoids are common on *M. sexta* larvae in the field

249 Surveys of a tobacco plot at three timepoints revealed that a high but variable proportion  
250 of *M. sexta* larvae were parasitized. The highest proportion of larvae parasitized by *C.*

251 *congregata* was observed at the first collection (0.57 parasitized in July 2013), compared with  
252 0.31 parasitized in August 2013 and 0.39 parasitized in July 2014 ( $X^2_2 = 16.74$ ,  $P < 0.001$ ) (SI  
253 Fig. 1). Median *C. congregata* parasitoid load emerging from an individual larva was 21.5 (N =  
254 44) and all larvae with parasitoids emerging died before pupation. Tachinid fly parasitoids  
255 eclosed from only two *M. sexta*.

256 The timing of *C. congregata* parasitoid emergence from *M. sexta* collected in the field at  
257 different instars was consistent with parasitoids ovipositing in younger larvae. Because  
258 parasitoids take a predictable amount of time to emerge from the host cuticle after oviposition  
259 (Gilmore 1938), the length of time between field collection and parasitoid emergence for larvae  
260 of different instar stages can be used to determine the age at parasitism. The number of days  
261 post-*M. sexta* field collection to *C. congregata* emergence was higher for host *M. sexta* collected  
262 as younger instars (GLM; instar 2  $b = 2.599$ ,  $P < 0.01$ ; instar 3  $b = -0.629$ ,  $P < 0.001$ ; instar 4  $b =$   
263  $-1.100$ ,  $P < 0.001$ ). There were no significant increases in the number of parasitoids emerging  
264 from third and fourth instar host *M. sexta* larvae compared with second instar host larvae (GLM;  
265 instar 2  $b = 2.99$ ,  $P < 0.01$ ; instar 3  $b = 0.255$ ,  $P = 0.236$ ; instar 4  $b = 0.340$ ,  $P = 0.094$ ) (Table 1).

#### 266 Immune responses to an artificial parasitoid do not trade-off with larval growth

267 Following implantation of an artificial parasitoid egg, *Manduca sexta* immune response  
268 (melanization) was higher in larvae with faster growth rates, regardless of diet. There was a  
269 positive relationship between growth rate post-challenge and the melanization of the artificial  
270 parasitoid (GLM;  $z = 0.20$ ,  $P < 0.001$ ). Growth rate prior to the artificial parasitoid did not affect  
271 melanization ( $z = -0.03$ ,  $P = 0.85$ ). Neither nicotine ( $z = -0.02$ ,  $P = 0.37$ ) nor rutin ( $z = 0.04$ ,  $P =$   
272  $0.10$ ) affected melanization. Larvae from the field-collected colony had higher immune

273 responses to the artificial parasitoid than larvae from the lab colony ( $z = 0.080$ ,  $P < 0.001$ ) with a  
274 mean melanization level of 19% for the field-collected colony and 12% for the lab colony.

#### 275 Secondary compounds increase developmental time for each larval instar

276         Developmental assays of *M. sexta* larvae revealed that the number of days needed to  
277 complete each instar is variable and secondary compounds extend the length of each instar.  
278 Nicotine and rutin increased the number of days needed to complete each of the first four instars  
279 but specific instars were not more sensitive to the effects of the secondary compounds (Table 2).  
280 Larvae spent the fewest number of days in the second instar but there was variation in  
281 development times between the nicotine and rutin experiments. In the *M. sexta* generation used  
282 to test the effects of nicotine, the number of days taken to complete the second and third instars  
283 was shorter than the number of days taken to complete the first and fourth instars (Table 2A). In  
284 the generation used to test the effects of rutin, only the second instar was shorter (Table 2B).

285         The overall effect of secondary compounds on larval development was to increase the  
286 number of days from hatching to pupation. In both colonies, the number of days from hatching to  
287 pupation was higher on the nicotine diet (GLM; field nicotine  $z = 2.183$ ,  $P = 0.029$ ; lab nicotine  
288  $z = 4.039$ ,  $P < 0.001$ ) and on the rutin diet (field rutin  $z = 4.149$ ,  $P < 0.001$ ; lab rutin  $z = 5.65$ ,  $P$   
289  $< 0.001$ ) compared to control diets (Table 3). Larvae normally complete five instars, but a small  
290 percent of larvae went through an additional sixth instar prior to pupation and this was more  
291 common in *M. sexta* in the lab colony fed nicotine and for *M. sexta* in lab and field-collected  
292 colonies fed rutin (SI Table 2).

#### 293 Pupal mass was reduced by larval consumption of secondary compounds

294         Larval consumption of secondary compounds decreased pupal mass but the sex-specific  
295 patterns differed between nicotine and rutin (Fig. 1). Pupal mass was smaller when larvae were

296 fed nicotine in both colonies (ANOVA; field nicotine  $F_{1,76} = 21.562, P < 0.001$ ; lab nicotine  $F_{1,112} = 23.527, P < 0.001$ ) (Fig. 1A). There was an interaction between sex and nicotine in the lab  
297 colony, such that females had a greater decrease in pupal mass from nicotine than males (lab  
298 sex\*nicotine  $F_{1,112} = 5.285, P = 0.023$ ) and male pupae were smaller than female (lab sex  $F_{1,112} = 8.265, P = 0.005$ ). The field-collected colony had no differences between male and female  
300 pupal mass (field sex  $F_{1,76} = 0.479, P = 0.491$ ) and there was no interaction between sex and  
301 nicotine (field sex\*nicotine  $F_{1,76} = 0.176, P = 0.676$ ) (Fig. 1A). Pupal mass also decreased in  
302 both colonies in response to rutin (ANOVA; field rutin  $F_{1,45} = 7.362, P = 0.009$ ; lab rutin  $F_{1,118} = 7.975, P = 0.006$ ). There was no interaction between sex and rutin (field sex\*rutin  $F_{1,45} = 2.196, P = 0.145$ ; lab sex\*rutin  $F_{1,118} = 0.277, P = 0.600$ ) although male pupae were smaller  
305 than female (field sex  $F_{1,45} = 7.071, P = 0.011$ ; lab sex  $F_{1,118} = 8.024, P = 0.005$ ) (Fig. 1B).

### 307 Secondary compounds do not increase *M. sexta* deformities

308 Minor deformities at the larval and pupal stage are common during *M. sexta* development  
309 but were not increased by dietary nicotine or rutin. The main deformities observed were  
310 incomplete larval molting (field N = 8/350 larvae; lab N = 13/320 larvae) and incomplete  
311 sclerotization of pupal cases (field N = 1/131 larvae; lab N = 26/243 larvae). The incidence of  
312 deformities was not increased by nicotine (one-sided Fisher's exact tests; molting: field  $P = 0.75$ ,  
313 lab  $P = 0.5$ ; incomplete sclerotization: field  $P = 1$ , lab  $P = 0.67$ ) or by rutin (one-sided Fisher's  
314 exact tests; molting: field  $P = 0.34$ , lab  $P = 0.36$ ; incomplete sclerotization: field  $P = 0.48$ , lab  $P = 0.51$ ).

### 316 *M. sexta* survival to adulthood is not decreased by larval consumption of secondary compounds

317 The proportion of *M. sexta* surviving to adult eclosion was not significantly reduced by  
318 either secondary compound in the larval diets. Larvae from the lab colony had only marginally

319 significantly reduced survival to adult eclosion when reared on nicotine compared to those fed  
320 the control diet ( $X^2_1 = 3.6$ ,  $N = 149$ ,  $P = 0.057$ ) and there were no differences in survival for  
321 moths from the field-collected colony when fed nicotine versus control diets ( $X^2_1 = 0$ ,  $N = 152$ ,  $P$   
322  $= 0.886$ ) (Fig. 2A). Rutin did not significantly decrease survival of moths from either colony  
323 (lab:  $X^2_1 = 0.7$ ,  $N = 158$ ,  $P = 0.408$ ; field  $X^2_1 = 0$ ,  $N = 189$ ,  $P = 0.956$ ) (Fig. 2B).

324 Adult body size was smaller when moths had consumed secondary compounds as larvae

325 Measurements of body length on newly eclosed adults showed that larval consumption of  
326 secondary compounds decreased *M. sexta* size at the adult stage, but the effects differed for  
327 female and male moths. These effects are not explained by size variation between the sexes, as  
328 male and female adult body lengths were similar within a colony (nicotine experiment: field sex  
329  $F_{1,72} = 0.342$ ,  $P = 0.561$ ; lab sex  $F_{1,105} = 0.398$ ,  $P = 0.530$ ; rutin experiment: field sex  $F_{1,43} =$   
330  $1.003$ ,  $P = 0.322$ ; lab sex  $F_{1,115} = 0.617$ ,  $P = 0.206$ ).

331 For both colonies, nicotine decreased adult length (ANOVA: field nicotine  $F_{1,72} = 7.978$ ,  
332  $P = 0.006$ ; lab nicotine  $F_{1,105} = 19.896$ ,  $P < 0.001$ ). The negative effect of nicotine on adult  
333 length was stronger on females than males from the field-collected colony (field sex\*nicotine  $F_{1,72} = 4.072$ ,  $P = 0.047$ ). There was no sex difference in the effect of nicotine in the lab colony (lab  
334 sex\*nicotine  $F_{1,105} = 0.366$ ,  $P = 0.546$ ).

336 Larval consumption of rutin decreased adult male body size in the field-collected colony  
337 (field sex\*rutin  $F_{1,43} = 4.419$ ,  $P = 0.041$ ; field rutin  $F_{1,43} = 3.835$ ,  $P = 0.057$ ). There was no effect  
338 of rutin on adult moth size for the lab colony (lab sex\*rutin  $F_{1,115} = 0.125$ ,  $P = 0.724$ ; lab rutin  
339  $F_{1,115} = 2.878$ ,  $P = 0.093$ ).

340 Adult wing size was smaller when moths had consumed secondary compounds as larvae

341 Larval consumption of secondary compounds decreased adult wing size. Males had

342 smaller wings than females but were not more sensitive to the effect of secondary compounds on  
343 wing length.

344 For both colonies, wing length was smaller when the *M. sexta* had been fed nicotine as  
345 larvae (ANOVA; field nicotine  $F_{1,70} = 19.432$ ,  $P < 0.001$ ; lab nicotine  $F_{1,102} = 18.505$ ,  $P < 0.001$ ).  
346 Although males had smaller wings than females (field sex  $F_{1,70} = 34.753$ ,  $P < 0.001$ ; lab sex  $F_{1,102} = 73.822$ ,  $P < 0.001$ ), the effect of nicotine did not differ between the sexes within a colony  
347 ( $F_{1,70} = 0.478$ ,  $P = 0.492$ ; lab sex\*nicotine  $F_{1,102} = 1.730$ ,  $P = 0.191$ ) (Fig.  
348 3A).

350 Similarly, larval rutin consumption decreased adult wing size (ANOVA; field rutin  $F_{1,42} = 20.99$ ,  $P < 0.001$ ; lab rutin  $F_{1,106} = 7.528$ ,  $P = 0.007$ ). Males had smaller wings than females  
351 (field sex  $F_{1,42} = 15.504$ ,  $P < 0.001$ ; lab sex  $F_{1,106} = 44.040$ ,  $P < 0.001$ ) but the effect of rutin did  
352 not differ between the sexes within a colony (field sex\*rutin  $F_{1,42} = 1.301$ ,  $P = 0.26$ ; lab  
353 sex\*rutin  $F_{1,106} = 0.02$ ,  $P = 0.88$ ) (Fig. 3B).

### 354 Female fecundity was unaffected by larval consumption of secondary compounds

356 Female fecundity (follicle number) did not differ between *M. sexta* reared on control diets  
357 versus those reared on diets containing secondary compounds, even when taking adult size  
358 differences into account. Although pupal weight and adult size traits were positively correlated,  
359 correlations between adult body size and follicle numbers were not present in most treatments  
360 (SI Table 3). Larval consumption of nicotine did not reduce adult follicle-body area ratios  
361 (ANOVA; field nicotine  $F_{1,39} = 0.113$ ,  $P = 0.738$ ; lab nicotine  $F_{1,57} = 0.663$ ,  $P = 0.419$ ).  
362 Similarly, larval consumption of rutin did not decrease the follicle-body area ratio (ANOVA;  
363 field rutin  $F_{1,13} = 0.085$ ,  $P = 0.775$ ; lab rutin  $F_{1,52} = 0.817$ ,  $P = 0.370$ ).

364 Neonate *M. sexta* do not show behavioral avoidance of diets with secondary compounds.



365 In the behavioral experiments testing for a preference for diets with or without secondary  
366 compounds, neonate larvae did not display significant avoidance of either nicotine or rutin diets.  
367 For larvae that chose between nicotine or control diets (N = 25/30 field, N= 36/38 lab), 48% of  
368 the field-collected colony chose control diet ( $\chi^2_1 = 0.04$ ,  $P = 0.842$ ) and 64% of the lab colony  
369 chose control diet ( $\chi^2_1 = 2.778$ ,  $P = 0.096$ ). For larvae that chose between rutin or control diets  
370 (N = 24/30 field, N = 37/38 lab), 38% of the field-collected colony chose control diet ( $\chi^2_1 = 1.5$ ,  
371  $P = 0.221$ ) and 43% of the lab colony chose control diet ( $\chi^2_1 = 0.676$ ,  $P = 0.411$ ).

372

### 373 **Discussion**

374 Plant-insect coevolution depends not only on plant defenses and herbivore counter-  
375 adaptations to these defenses, but also on tri-trophic interactions that include top-down effects  
376 (Bruce 2014). In this study, I examined the effects of plant secondary compounds on herbivore  
377 fitness in the context of natural enemies. Using field surveys of parasitoid prevalence paired with  
378 experimental measurements of the effects of larval consumption of secondary compounds on  
379 growth and fitness traits across *Manduca sexta* life stages, I show that natural enemies kill a  
380 large proportion of *M. sexta* larvae in the field, while the fitness effects of dietary secondary  
381 compound ingestion are less severe (Table 4). Previous studies have established that a defended  
382 diet is protective against parasitoids (Thorpe and Barbosa 1986, Barbosa *et al.* 1991, Harvey *et*  
383 *al.* 2007) but the ecological importance of this benefit is highly dependent on parasitoid  
384 prevalence. Prior studies using controlled parasitoid oviposition on predetermined hosts or  
385 studies that introduce laboratory *M. sexta* into a field setting may not reflect interactions in the  
386 field. In this study, I provide important evidence that that parasitoids kill a large proportion of *M.*  
387 *sexta* larvae in the field, representing a total loss of fitness for parasitized hosts.

388           The *M. sexta* larval growth patterns seen in this study minimize exposure to parasitoids  
389 during the timeframe that larvae are most likely to be parasitized. I found relatively faster *M.*  
390 *sexta* development time during the second and third instars, which aligns with the instars  
391 preferred for *C. congregata* oviposition (Gilmore 1938, Beckage and Riddiford 1978, Barbosa *et*  
392 *al.* 1991, Kingsolver *et al.* 2012). In the field survey, similar numbers of parasitoids emerged  
393 from larvae removed from the field as second to fourth instars, suggesting that larvae remaining  
394 in the field as fourth instars did not result in additional parasitoids. Parasitoids also emerged  
395 quickly from larvae removed from the field as fourth instars, indicating the parasitoids had been  
396 laid prior to the fourth instar based on a 12-16 day oviposition-to-emergence time (Gilmore  
397 1938).

398           Rapid development that reduces exposure time to parasitoids is expected to be beneficial,  
399 as fast growth did not come at the cost of reducing immune responses to an artificial parasitoid  
400 egg. Although *C. congregata* often lay more than a single egg in an oviposition event, the  
401 immune stress represented by a single parasitoid egg represents a parasitoid attack that an *M.*  
402 *sexta* larvae could survive by mounting a strong immune response that prevented the parasitoid  
403 egg from hatching. In contrast to the predicted energetic trade-off between growth and immunity  
404 (Smilanich *et al.* 2009), I found that larvae with higher growth rates following injection of the  
405 artificial parasitoid egg actually had higher levels of melanization regardless of control or  
406 defended diets. The lack of a growth-immune trade-off in *Manduca sexta* has also been observed  
407 in other recent studies (Wilson *et al.* 2019) and may be because *M. sexta* larvae do not actively  
408 sequester plant compounds and therefore do not have this energetic cost (Wink and Theile 2002,  
409 Smilanich *et al.* 2009). Nicotine and rutin did not increase melanization of the artificial  
410 parasitoid egg, suggesting that host immune responses to secondary compounds are unlikely to

411 be a significant driver of the reduced parasitoid success on hosts fed nicotine seen in other  
412 studies (Beckage and Riddiford 1978, Barbosa *et al.* 1986, Barbosa *et al.* 1991, Harvey *et al.*  
413 2007). Although it is possible that real and/or additional parasitoid eggs would increase *M.*  
414 *sexta*'s immune response to a greater extent than an artificial parasitoid egg, *C. congregata*  
415 parasitoids have been shown to impair host encapsulation responses by infecting their hosts with  
416 immunosuppressant viruses during oviposition (Amaya *et al.* 2005). Therefore, the protective  
417 effects of secondary compounds against *M. sexta* parasitoids probably result from toxicity of  
418 nicotine to the parasitoids or the indirect effects of slowed *M. sexta* growth on *C. congregata*  
419 development (Barbosa *et al.* 1986, Appel and Martin 1992). Interestingly, I observed higher  
420 melanization rates in the field-collected colony than in the lab colony, which may reflect that the  
421 lab colony has been removed from parasitoid pressures for many generations (Diamond and  
422 Kingsolver 2011, Kingsolver *et al.* 2020).

423         Secondary compounds had negative effects on larval size and developmental time that  
424 can impact interactions with parasitoids, even in the absence of effects on immune responses.  
425 Different larval instars may be more or less susceptible to the effects of secondary compounds  
426 (van Dam *et al.* 2011) because of the differences in size and amount of food required to complete  
427 the different instars. In this study, nicotine and rutin extended the amount of time larvae needed  
428 to complete each instar, with no instar specific effects of either compound. Delayed development  
429 time and smaller size of *M. sexta* fed secondary compounds as larvae may be the result of  
430 changes in digestion, energy spent on maintenance metabolism (Appel and Martin 1992),  
431 reduced consumption of defended diets (Voelckel 2001), or disruptions in juvenile hormone (Lee  
432 *et al.* 2015). The low levels of incomplete molting I observed in *M. sexta* larvae indicate any  
433 changes in hormone levels due to secondary compounds were not enough to fully disrupt

434 molting. Regardless of mechanism, an extended development time means herbivores are exposed  
435 to parasitoids for longer when feeding on defended tissues, but this may be offset by the smaller  
436 size of these larvae making them harder for parasitoids to locate (Clancy and Price 1987, Benrey  
437 and Denno 1997).

438         These effects of exposure to secondary compounds at the larval stage contribute to *M.*  
439 *sexta* fitness either by altering the probability of surviving to reproduce as adults or through  
440 correlations with adult reproductive traits. In the absence of parasitoid pressures, larval  
441 consumption of secondary compounds did not affect survival to adult eclosion or fecundity but  
442 had negative effects on adult body size and wing size. Females with smaller bodies have been  
443 shown to have reduced pheromone production in other Lepidoptera and may be less attractive to  
444 males (Harari *et al.* 2011). Wing size is positively correlated with increased flight time and  
445 distance which may be important for finding mates or host plants for egg laying (Shirai 1993,  
446 Berwaerts *et al.* 2002, Cahenzli *et al.* 2015). Although I found that fecundity (female follicle  
447 numbers) did not differ based on consumption of secondary compounds, actual fertility may be  
448 lower if these eggs are not fertilized because of reduced mating success. Body and wing traits  
449 may also impact an adult's ability to disperse offspring and/or choose appropriate oviposition  
450 sites. However, the impact of maternal oviposition choice depends on whether offspring can  
451 behaviorally select their own feeding sites or if early diet is determined by hatching location  
452 (Jaenike 1978, Soler *et al.* 2012).

453         The lack of neonate differentiation I observed between defended and non-defended diets  
454 is evolutionarily important because it indicates that maternal oviposition choices rather than  
455 offspring choices likely determine whether offspring experience early exposure to secondary  
456 compounds (Kester *et al.* 2002). Behavioral responses to plant compounds may vary based on

457 herbivore age. In other studies that have used older larvae, nicotine has shown to be deterrent  
458 (Kester *et al.* 2002; Parr and Thurston 1972) while rutin has not been shown to deter feeding and  
459 has even been seen to stimulate feeding (De Boer and Hanson 1987, Stamp and Skrobola 1993).  
460 The lack of an effect of secondary compounds on neonate choice could indicate that mechanisms  
461 needed to recognize chemical cues are not completely developed until later instars, that there are  
462 additional important leaf cues that are not present in an artificial diet, or that deterrence may  
463 occur via post-ingestive mechanisms rather than pre-ingestive mechanisms (Glendinning 2002).

464

## 465 **Conclusions**

466 Overall, the results of this study indicate that although nicotine and rutin differ in their  
467 chemical composition and prevalence in plants, both have negative effects on *M. sexta* that  
468 extend past the larval stage at which the compounds are consumed. Despite effects on adult body  
469 and wing size that may influence mating and offspring dispersal, there were no strong effects on  
470 survival or fecundity. Therefore, the negative effects of secondary compounds on *M. sexta*  
471 development and fitness are likely outweighed by the known protection that ingestion of these  
472 compounds offers against *C. congregata* parasitoids, which exerted large negative survival costs  
473 on *M. sexta* in the field. At a larger scale, coevolutionary and tri-trophic interactions can  
474 maintain a balance between the costs and benefits of secondary compounds on herbivore fitness.

475

476

477

478

479

480 **References**

- 481 Alleyne, M. and Beckage, N.E. (1997) Parasitism-induced effects on host growth and  
482 metabolic efficiency in tobacco hornworm larvae parasitized by *Cotesia congregata*.  
483 *Journal of Insect Physiology*, **43**, 407-424.
- 484 Amaya, K.E., Asgari, S., Jung, R., Hongskula, M., Beckage, N. (2005). Parasitization of  
485 *Manduca sexta* larvae by the parasitoid wasp *Cotesia congregata* induces an impaired  
486 host immune response. *Journal of Insect Physiology*, **51**, 505-512.
- 487 Appel, H.M. and Martin, M.M (1992) Significance of metabolic load in the evolution of host  
488 specificity of *Manduca sexta*. *Ecology*, **73**, 216-228.
- 489 Barbosa, P., Saunders, J.A., Kemper, J., Trumbule, R., Olechno, J., and Martinat, P. (1986)  
490 Plant allelochemicals and insect parasitoids effects of nicotine on *Cotesia congregata*  
491 (say) (Hymenoptera, Braconidae) and *Hyposoter annulipes* (Cresson) (Hymenoptera,  
492 Ichneumonidae). *Journal of Chemical Ecology*, **12**, 1319-1328.
- 493 Barbosa, P., Gross, P., and Kemper, J. (1991) Influence of plant allelochemicals on the tobacco  
494 hornworm and its parasitoid, *Cotesia congregata*. *Ecology*, **72**, 1567-1575.
- 495 Barron, A.B. (2001) The life and death of Hopkins' host-selection principle. *Journal of Insect*  
496 *Behavior*, **14**, 725-737.
- 497 Beckage, N.E. and Riddiford, L.M. (1978) Developmental interactions between tobacco  
498 hornworm *Manduca sexta* and its braconid parasite *Apanteles congregatus*.  
499 *Entomologia Experimentalis Et Applicata*, **23**, 139-151.
- 500 Beetz, S., Holthusen, T.K., Koolman, J., & Trenczek, T. (2008) Correlation of hemocyte counts  
501 with different developmental parameters during the last larval instar of the tobacco  
502 hornworm, *Manduca sexta*. *Archives of Insect Biochemistry and Physiology*, **67**, 63-75.

- 503 Benrey, B. and Denno, R.F. (1997) The slow-growth—high-mortality hypothesis: a test using the  
504 cabbage butterfly. *Ecology*, **78**, 987-999.
- 505 Berwaerts, K., Van Dyck, H., and Aerts, P. (2002) Does flight morphology relate to flight  
506 performance? An experimental test with the butterfly *Pararge aegeria*. *Functional*  
507 *Ecology*, **16**, 484-491.
- 508 Bessin, R.T. and Reagan, T.E. (1990) Fecundity of sugarcane borer (Lepidoptera, Pyralidae), as  
509 affected by larval development on gramineous host plants. *Environmental Entomology*,  
510 **19**, 635-639.
- 511 Box, G.E.P. and Cox, D.R. (1964) An analysis of transformations. *Journal of the Royal*  
512 *Statistical Society Series B-Statistical Methodology*, **26**, 211-252.
- 513 Bruce, J.A. (2014) Interplay between insects and plants: dynamic and complex interactions that  
514 have coevolved over millions of years but act in milliseconds. *Journal of Experimental*  
515 *Botany*, **66**, 455-465.
- 516 Bukovinszky, T., Poelman, E.H., Gols, R., Prekatsakis, G., Vet, L.E.M., Harvey, J.A., and Dicke,  
517 M. (2009) Consequences of constitutive and induced variation in plant nutritional quality  
518 for immune defence of a herbivore against parasitism. *Oecologia*, **160**, 299-308.
- 519 Cahenzli, F., Wenk, B.A., and Erhardt, A. (2015) Female butterflies adapt and allocate their  
520 progeny to the host-plant quality of their own larval experience. *Ecology*, **96**, 1966-1973.
- 521 Clancy, K.M. and Price, P.W. (1987) Rapid herbivore growth enhances enemy attack: sublethal  
522 plant defenses remain a paradox. *Ecology*, **68**, 733-737.
- 523 Corbet, S.A. (1985) Insect chemosensory responses - a chemical legacy hypothesis. *Ecological*  
524 *Entomology*, **10**, 143-153.

- 525 D'Incao, M.P., Gosmann, G., Machado, V., Fiuza, L.M., Moreira, G.R.P. (2012) Effect of  
526 Saponin Extracted from *Passiflora alata* Dryander (Passifloraceae) on development of  
527 *Spodoptera frugiperda* (J.E. Smith) (Lepidoptera, Noctuidae). *International Journal of*  
528 *Plant Research*, **2**, 151-159.
- 529 De Boer, G. and Hanson, F.E. (1987) Feeding responses to solanaceous allelochemicals by  
530 larvae of the tobacco hornworm *Manduca sexta*. *Entomologia Experimentalis et*  
531 *Applicata*, **45**, 123-132.
- 532 Diamond, S.E., Hawkins, S.D., Nijhout, H.F., and Kingsolver, J.G. (2010) Evolutionary  
533 divergence of field and laboratory populations of *Manduca sexta* in response to host-plant  
534 quality. *Ecological Entomology*, **35**, 166-174.
- 535 Diamond, S.E. and Kingsolver, J.G. (2011) Host plant quality, selection history and trade-offs  
536 shape the immune responses of *Manduca sexta*. *Proceedings of the Royal Society B-*  
537 *Biological Sciences*, **278**, 289-297.
- 538 Eggleton, P. and Belshaw, R. (1992) Insect parasitoids: an evolutionary overview. *Philosophical*  
539 *Transactions: Biological Sciences*, **337**, 1-20.
- 540 Ehrlich, P.R. and Raven, P.H. (1964) Butterflies and plants - a study in coevolution. *Evolution*,  
541 **18**, 586-608.
- 542 Fellous, S. and Lazzaro, B.P. (2010) Larval food quality affects adult (but not larval) immune  
543 gene expression independent of effects on general condition. *Molecular Ecology*, **19**,  
544 1462-1468.
- 545 Fox, J. and Weisberg, S. (2011) An {R} Companion to Applied Regression, Second Edition.  
546 Thousand Oaks CA: Sage.



- 547 Furstenberg-Hagg, J., Zagrobelny, M., and Bak, S. (2013) Plant defense against insect  
548 herbivores. *International Journal of Molecular Sciences*, **14**, 10242-10297.
- 549 Garvey, M.A., Creighton, J.C., and Kaplan, I. (2020) Tritrophic interactions reinforce a negative  
550 preference–performance relationship in the tobacco hornworm (*Manduca sexta*).  
551 *Ecological Entomology*, **45**, 783-794.
- 552 Gauld, I.D., Gaston, K.J., and Janzen, D.H. (1992) Plant allelochemicals, tritrophic interactions  
553 and the anomalous diversity of tropical parasitoids: the 'nasty' host hypothesis. *Oikos*, **65**,  
554 352-357.
- 555 Gilmore, J.U. (1938) Notes on *Apanteles congregatus* (Say) as a parasite of tobacco  
556 hornworms. *Journal of Economic Entomology*, **31**, 712-715.
- 557 Glendinning, J.I. (2002) How do herbivorous insects cope with noxious secondary plant  
558 compounds in their diet? *Entomologia Experimentalis Et Applicata*, **104**, 15-25.
- 559 Godfray, H.C.J. (1994) *Parasitoids: behavioral and evolutionary ecology*. i-ix, 1-473.  
560 Princeton University Press. Princeton, N.J
- 561 Granzow, P., Shalovsky, T., and Johnson, A. (1985) Effect of nicotine concentration in an  
562 artificial diet on the development and survival of newly hatched tobacco budworm  
563 *Heliothis virescens* larvae. *Tobacco Science*, **29**, 111-112.
- 564 Harvey, J.A., Van Dam, N.M., Witjes, L.M.A., Solerri, R., and Gols, R. (2007) Effects of  
565 dietary nicotine on the development of an insect herbivore, its parasitoid and secondary  
566 hyperparasitoid over four trophic levels. *Ecological Entomology*, **32**, 15-23.
- 567 Hassell, M.P. and Waage, J.K. (1984) Host-parasitoid population interactions. *Annual Review*  
568 *of Entomology*, **29**, 89-114.

- 569 Hopkins, A.D. (1917) A discussion of C. G. Hewitt's paper on. "Insect Behaviour." *Journal of*  
570 *Economic Entomology*, **10**, 92-93.
- 571 Howe, G.A. and Jander, G. (2008) Plant immunity to insect herbivores. *Annual Review of Plant*  
572 *Biology*, **59**, 41-66.
- 573 Jaenike, J. (1978) Optimal oviposition behavior in phytophagous insects. *Theoretical Population*  
574 *Biology*, **14**, 350-356.
- 575 Kariyat, R.R. and Portman, S.L. (2016). Plant-herbivore interactions: Thinking beyond larval  
576 growth and mortality. *American Journal of Botany*, **103**, 789-791.
- 577 Keinanen, M., Oldham, N.J., and Baldwin, I.T. (2001) Rapid HPLC screening of jasmonate-  
578 induced increases in tobacco alkaloids, phenolics, and diterpene glycosides in *Nicotiana*  
579 *attenuata*. *Journal of Agricultural and Food Chemistry*, **49**, 3553-3558.
- 580 Kessler, A. and Baldwin, I.T. (2004) Herbivore-induced plant vaccination. Part I. The  
581 orchestration of plant defenses in nature and their fitness consequences in the wild  
582 tobacco *Nicotiana attenuata*. *Plant Journal*, **38**, 639-649.
- 583 Kester, K.M., Peterson, S.C., Hanson, F., Jackson, D.M., and Severson, R.F. (2002) The roles of  
584 nicotine and natural enemies in determining larval feeding site distributions of *Manduca*  
585 *sexta* L. and *Manduca quinquemaculata* (Haworth) on tobacco. *Chemoecology*, **12**, 1-10.
- 586 Kingsolver, J.G. (2007) Variation in growth and instar number in field and laboratory  
587 *Manduca sexta*. *Proceedings: Biological Sciences*, **274**, 977-981.
- 588 Kingsolver, J.G., Ragland, G.J., and Diamond, S.E. (2009) Evolution in a constant environment:  
589 thermal fluctuations and thermal sensitivity of laboratory and field populations of  
590 *Manduca sexta*. *Evolution*, **63**, 537-541.

- 591 Kingsolver, J.G., Diamond, S.E., Seiter, S.A., and Higgins, J.K. (2012) Direct and indirect  
592 phenotypic selection on developmental trajectories in *Manduca sexta*. *Functional*  
593 *Ecology*, **26**, 598-607.
- 594 Kingsolver, J.G., Moore, M.E., Hill, C.A., Augustine, K.E. (2020). Growth, stress, and  
595 acclimation responses to fluctuating temperatures in field and domesticated populations  
596 of *Manduca sexta*. *Ecology and Evolution*, **10**, 13980-13989.
- 597 Kraaijeveld, A.R., Limentani, E.C., and Godfray, H.C.J. (2001) Basis of the trade-off between  
598 parasitoid resistance and larval competitive ability in *Drosophila melanogaster*.  
599 *Proceedings of the Royal Society B-Biological Sciences*, **268**, 259-261.
- 600 Krewson, C.F. and Naghski, J. (1953) Occurrence of rutin in plants. *American Journal of*  
601 *Pharmacy and the sciences supporting public health*, **125**, 190-193.
- 602 Kumar, P., Rathi, P., Schöttner, M., Baldwin, I.T., Pandit, S. (2014) Differences in nicotine  
603 metabolism of two *Nicotiana attenuata* herbivores render them differentially susceptible  
604 to a common native predator. *PLoS One*, **9**, e95982.
- 605 Lee, S.-H., Oh, H.-W., Fang, Y., An, S.-B., Park, D.-S., Song, H.-H., Oh, S.-R., Kim, S.-Y.,  
606 Kim, S., Kim, N., Raikhel, A.S., Je, Y.H., and Shin, S.W. (2015) Identification of plant  
607 compounds that disrupt the insect juvenile hormone receptor complex. *Proceedings of the*  
608 *National Academy of Sciences of the United States of America*, **112**, 1733-1738.
- 609 Lesnoff, M. and Lancelot, R. (2012) aod: Analysis of Overdispersed Data. R package version  
610 1.3, URL [http://cran.r-project.org/package = aod](http://cran.r-project.org/package=aod).
- 611 Maron, J.L., Agrawal, A.A., Schemske, D.W. (2019) Plant-herbivore coevolution and plant  
612 speciation. *Ecology*, **100**, e02704.

- 613 Ode, P.J. (2006). Plant chemistry and natural enemy fitness: Effects on herbivore and natural  
614 enemy interactions. *Annual review of entomology*, **51**, 163-185.
- 615 Parr, J.C. and Thurston, R. (1972) Toxicity of nicotine in synthetic diets to larvae of tobacco  
616 hornworm Lepidoptera-Sphingidae. *Annals of the Entomological Society of America*, **65**,  
617 1185-1188.
- 618 Piesk, M., Karl, I., Franke, K., and Fischer, K. (2013) High larval density does not induce a  
619 prophylactic immune response in a butterfly. *Ecological Entomology*, **38**, 346-354.
- 620 Price, P.W., Bouton, C.E., Gross, P., McPherson, B.A., Thompson, J.N., and Weis, A.E. (1980)  
621 Interactions among 3 trophic levels - influence of plants on interactions between insect  
622 herbivores and natural enemies. *Annual Review of Ecology and Systematics*, **11**, 41-65.
- 623 R Core Team. (2014) *R: A language and environment for statistical computing*. R Foundation for  
624 Statistical Computing.
- 625 Saitoh, F., Noma, M., and Kawashima, N. (1985) The alkaloid contents of 60 Nicotiana  
626 species. *Phytochemistry*, **24**, 477-480.
- 627 Shirai, Y. (1993) factors influencing flight ability of male-adults of the diamondback moth,  
628 *Plutella-xylostella*, with special reference to temperature conditions during the larval  
629 stage. *Applied Entomology and Zoology*, **28**, 291-301.
- 630 Sisson, V.A. and Saunders, J.A. (1983) Catalog of the tobacco introductions in the United-  
631 States- Department-of-Agricultures tobacco germplasm collection (*Nicotiana tabacum*).  
632 Alkaloid content of the cured leaf. *Science and Education Administration Publications*,  
633 ARM, NS-27:1-27.
- 634 Sisson, V.A. and Saunders, J.A. (1982) Alkaloid composition of the USDA tobacco (*Nicotiana*  
635 *tabacum* L.) introduction collection. *Tobacco International*, **184**, 30-33.

- 636 Smilanich, A.M., Dyer, L.A., Chambers, J.Q., and Bowers, M.D. (2009) Immunological cost of  
637 chemical defence and the evolution of herbivore diet breadth. *Ecology Letters*, **12**, 612-  
638 621.
- 639 Soler, R., Pineda, A., Li, Y., Ponzio, C., van Loon, J.J.A., Weldegergis, B.T., and Dicke, M.  
640 (2012) Neonates know better than their mothers when selecting a host plant. *Oikos*, **121**,  
641 1923-1934.
- 642 Spurgeon, D.W., Lingren, P.D., Shaver, T.N., and Raulston, J.R. (1995) Realized and potential  
643 fecundity of the mexican rice borer (Lepidoptera, Pyralidae) as a function of pupal  
644 weight. *Environmental Entomology*, **24**, 94-98.
- 645 Stamp, N.E. and Skrobola, C.M. (1993) Failure to avoid rutin diets results in altered food  
646 utilization and reduced growth-rate of *Manduca sexta* larvae. *Entomologia*  
647 *Experimentalis Et Applicata*, **68**, 127-142.
- 648 Steppuhn, A., Gase, K., Krock, B., Halitschke, R., and Baldwin, I.T. (2004) Nicotine's defensive  
649 function in nature. *Plos Biology*, **2**, 1074-1080.
- 650 Stireman, J.O. III., O'Hara, J.E., and Wood, D.M. (2006). Tachinidae: Evolution, behavior, and  
651 ecology. *Annual Review of Entomology*, **51**, 525-555.
- 652 Thaler, J.S., McArt, S.H., and Kaplan, I. (2012) Compensatory mechanisms for ameliorating the  
653 fundamental trade-off between predator avoidance and foraging. *Proceedings of the*  
654 *National Academy of Sciences of the United States of America*, **109**, 12075-12080.
- 655 Therneau, T. (2015) A Package for Survival Analysis in R. version 2.38, [http://CRAN.R-](http://CRAN.R-project.org/package=survival)  
656 [project.org/package = survival](http://CRAN.R-project.org/package=survival).
- 657 Therneau, T.M. and Grambsch, P.M. (2000) Modeling Survival Data: Extending the Cox Model.  
658 Springer, New York. ISBN 0-387-98784-3.

- 659 Thompson, S.N. and Redak, R.A. (2007) Nicotine moderates the effects of macronutrient  
660 balance on nutrient intake by parasitized *Manduca sexta* L. *Journal of Comparative*  
661 *Physiology B-Biochemical Systemic and Environmental Physiology*, **177**, 375-391.
- 662 Thorpe, K.W. and Barbosa, P. (1986) Effects of consumption of high and low nicotine tobacco  
663 by *Manduca sexta* (Lepidoptera, Sphingidae) on survival of gregarious endoparasitoid  
664 *Cotesia congregata* (Hymenoptera, Braconidae). *Journal of Chemical Ecology*, **12**,  
665 1329-1337.
- 666 van der Most, P.J., de Jong, B., Parmentier, H.K., and Verhulst, S. (2011) Trade-off between  
667 growth and immune function: a meta-analysis of selection experiments. *Functional*  
668 *Ecology*, **25**, 74-80.
- 669 Voelckel, C., Krügel, T., Gase, K., Heidrich, N, van Dam, N.M., Winz, R., and Baldwin, I.T.  
670 (2001). Anti-sense expression of putrescine N-methyltransferase confirms defensive role  
671 of nicotine in *Nicotiana sylvestris* against *Manduca sexta*. *Chemoecology*, **11**, 121-126.
- 672 Wilson, J.K., Ruiz, L., and Davidowitz, G. (2019). Dietary protein and carbohydrates affect  
673 immune function and performance in a specialist herbivore insect (*Manduca sexta*).  
674 *Physiological and Biochemical Zoology*, **92**, 58-70.
- 675 Wink, M. and Theile, V. (2002) Alkaloid tolerance in *Manduca sexta* and phylogenetically  
676 related sphingids (Lepidoptera : Sphingidae). *Chemoecology*, **12**, 29-46.
- 677 Yamamoto, R.T. and Fraenkel, G.S. (1960) The specificity of the tobacco hornworm,  
678 *Protoparce sexta*, to Solanaceous plants. *Annals of the Entomological Society of America*,  
679 **53**, 503-507.
- 680 Zeileis, A. and Hothorn, T. (2002) Diagnostic checking in regression relationships. *R News*, **2**,  
681 7-10.

682 **Table 1.** Proportion of *Manduca sexta* with parasitoids, parasitoid load, and emergence times on  
683 *M. sexta* collected from the field as different instars. The proportion of larvae with parasitoids  
684 was calculated based on field collections from July 2014. The number of *C. congregata* is  
685 presented as the median per *M. sexta* host. The time to emergence is presented as the median  
686 number of days from *M. sexta* field collection to parasitoid larval emergence through the host  
687 cuticle. For *C. congregata* number and days to emergence, host sample size and inter-quartile  
688 range are presented in parentheses.

689

| <i>M. sexta</i> instar | Proportion of larvae with parasitoids | Median number of <i>C. congregata</i> per host | Days until <i>C. congregata</i> emergence |
|------------------------|---------------------------------------|------------------------------------------------|-------------------------------------------|
| 2                      | 0.20 (N=56)                           | 18 (N=11, IQR= 13-26)                          | 14 (N=11, IQR= 12-15)                     |
| 3                      | 0.53 (N=53)                           | 20 (N=21, IQR= 12-30)                          | 7 (N=58, IQR= 6-9)                        |
| 4                      | 0.60 (N=20)                           | 28 (N=12, IQR= 18-36)                          | 4 (N=23, IQR= 3-5)                        |

690

691

692

693

694

695

696

697

698

699

700

701

702 **Table 2.** The number of days spent in each instar in both the field-collected colony and lab  
 703 colony increased in response to A) nicotine or B) rutin. Grey rows show the total number of days  
 704 these secondary compounds add to the number of days per instar and significant effects of  
 705 nicotine and rutin are indicated by asterisks (\*). Rows for each instar indicate the total number of  
 706 days spent in each instar and the results of the GLM and Wald tests comparing the lengths of  
 707 instars 2,3, and 4 to the time spent in instar 1. Asterisks (\*) following *P* values for instars show  
 708 significantly shorter or longer times in those instars compared to instar 1 ( $P < 0.05$ ).

709

| A)              | <u>Field</u> |          |          | <u>Lab</u>  |          |          |
|-----------------|--------------|----------|----------|-------------|----------|----------|
|                 | days         | <i>z</i> | <i>P</i> | days        | <i>z</i> | <i>P</i> |
| <b>Nicotine</b> | +0.7/instar  | 2.77     | <0.01*   | +0.7/instar | 3.53     | <0.01*   |
| instar 1        | 5.4          | 35.31    | <0.01    | 4.7         | 35.40    | <0.01    |
| instar 2        | 4.1          | -4.30    | <0.01*   | 3.6         | -4.40    | <0.01*   |
| instar 3        | 4.0          | -4.80    | <0.01*   | 4.0         | -2.62    | 0.01*    |
| instar 4        | 5.0          | -1.22    | 0.22     | 4.7         | 0.00     | 1        |
| B)              | <u>Field</u> |          |          | <u>Lab</u>  |          |          |
|                 | days         | <i>z</i> | <i>P</i> | days        | <i>z</i> | <i>P</i> |
| <b>Rutin</b>    | +0.8/instar  | 2.57     | 0.01*    | +0.7/instar | 3.68     | <0.001*  |
| instar 1        | 4.6          | 23.45    | <0.01    | 4.2         | 32.80    | <0.01    |
| instar 2        | 3.9          | -3.06    | 0.01*    | 3.5         | -2.95    | <0.01*   |
| instar 3        | 4.1          | -1.24    | 0.22     | 4.3         | 0.50     | 0.62     |
| instar 4        | 5.7          | 2.68     | <0.01*   | 5.3         | 4.11     | <0.001*  |

710

711

712



713 **Table 3.** Consumption of nicotine and rutin increased the number of days to pupation for both  
714 the field-collected and lab colonies. Values are presented as medians followed by interquartile  
715 ranges in parentheses. Asterisks (\*) indicate a significantly longer development time on the diet  
716 containing the secondary compound compared with the control (GLM  $P < 0.05$ ). Separate  
717 controls are presented for nicotine and rutin because the effects of these secondary compounds  
718 were tested at different generations.

| <b>Days from hatching to pupation</b> |                |                  |                |              |
|---------------------------------------|----------------|------------------|----------------|--------------|
|                                       | <b>control</b> | <b>nicotine</b>  | <b>control</b> | <b>rutin</b> |
| <b>Field</b>                          | 31 (29-33)     | 34* (32.25-35)   | 29 (28-31)     | 36* (33-38)  |
| <b>Lab</b>                            | 28.5 (28-30)   | 32.5* (31.75-34) | 29 (28-31)     | 35* (33-38)  |

719

720

721

722

723

724

725

726

727

728

729

730

731

732

733

734

735

736

737

738 **Table 4.** Summary of *Manduca sexta* responses to secondary compounds for the traits measured  
 739 across life stages. Dashes indicate no significant effect and an arrow indicates a significant  
 740 negative effect of the secondary compound compared to the control diet at  $P < 0.05$ . The  
 741 direction of the arrow indicates whether the secondary compound increased or decreased the  
 742 trait.

| Stage  | Trait              | effect of nicotine |     | effect of rutin |     |
|--------|--------------------|--------------------|-----|-----------------|-----|
|        |                    | field              | lab | field           | lab |
| larvae | immunity           | -                  | -   | -               | -   |
|        | days per instar    | ↑                  | ↑   | ↑               | ↑   |
|        | incomplete molting | -                  | -   | -               | -   |
|        | diet choice        | -                  | -   | -               | -   |
| pupa   | development time   | ↑                  | ↑   | ↑               | ↑   |
|        | pupal mass         | ↓                  | ↓   | ↓               | ↓   |
| adult  | survival           | -                  | -   | -               | -   |
|        | body length        | ↓                  | ↓   | ↓               | -   |
|        | wing length        | ↓                  | ↓   | ↓               | ↓   |
|        | follicle number    | -                  | -   | -               | -   |

743

744

745

746

747

748

749

750

751

752

753

754

755 **Figure 1.** *Manduca sexta* pupae were smaller when larvae were fed secondary compounds.  
756 **A)** *M. sexta* larvae fed nicotine (red) weighed less at pupation than those fed control diets (grey)  
757 (ANOVA,  $P < 0.01$  for both colonies) **B)** *M. sexta* larvae fed rutin (green) weighed less at  
758 pupation than those fed control diets (grey) (ANOVA,  $P < 0.01$  for both colonies). Separate  
759 controls are presented for nicotine and rutin because the effects of these secondary compounds  
760 were tested at different generations.

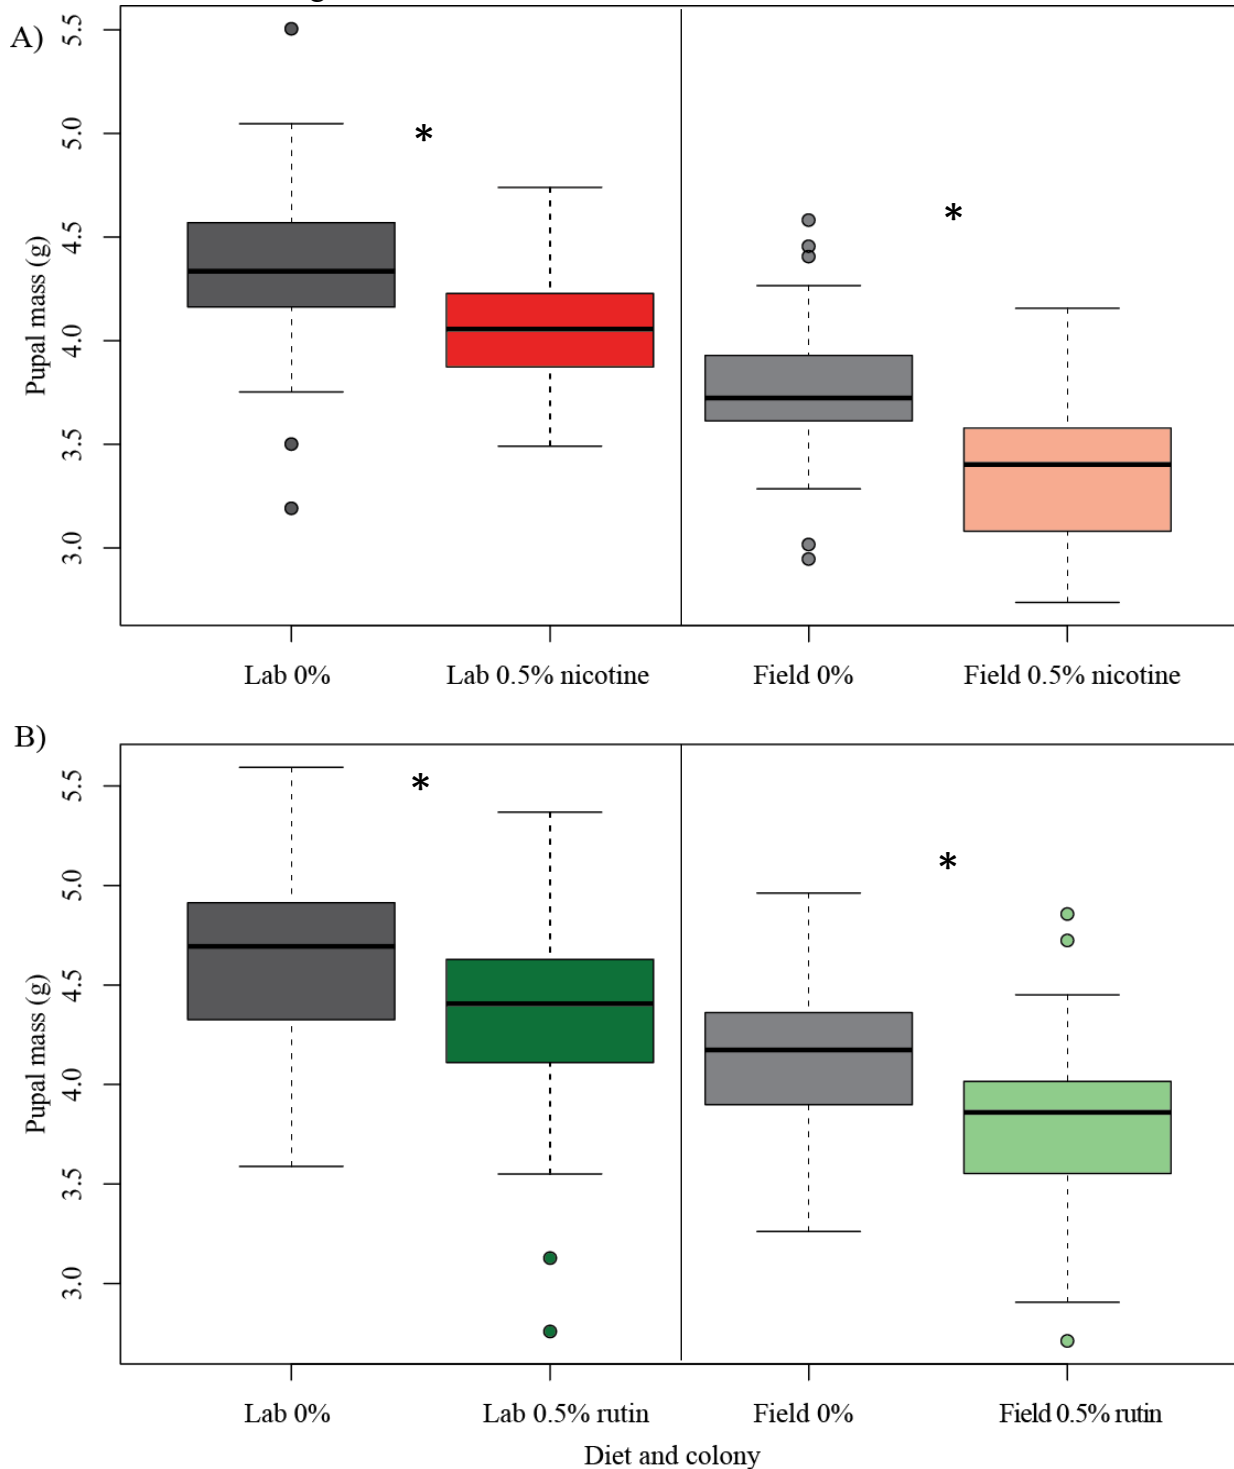

761

762 **Figure 2.** Secondary compounds did not significantly decrease *Manduca sexta* survival to adult  
763 eclosion. **A)** *M. sexta* from the field-collected colony had similar survival on nicotine (red)  
764 versus control diets (grey) but there was a slight, non-significant decrease in survival for lab  
765 colony fed nicotine (Kaplan-Meier survival curves; field  $P = 0.9$ , lab  $P = 0.06$ ). **B)** Neither  
766 colony had reduced survival on rutin (green) versus control diets (grey) (field  $P > 0.01$ , lab  $P >$   
767 0.1). Tick marks represent censored data (insects that pupated prior to end of time period).

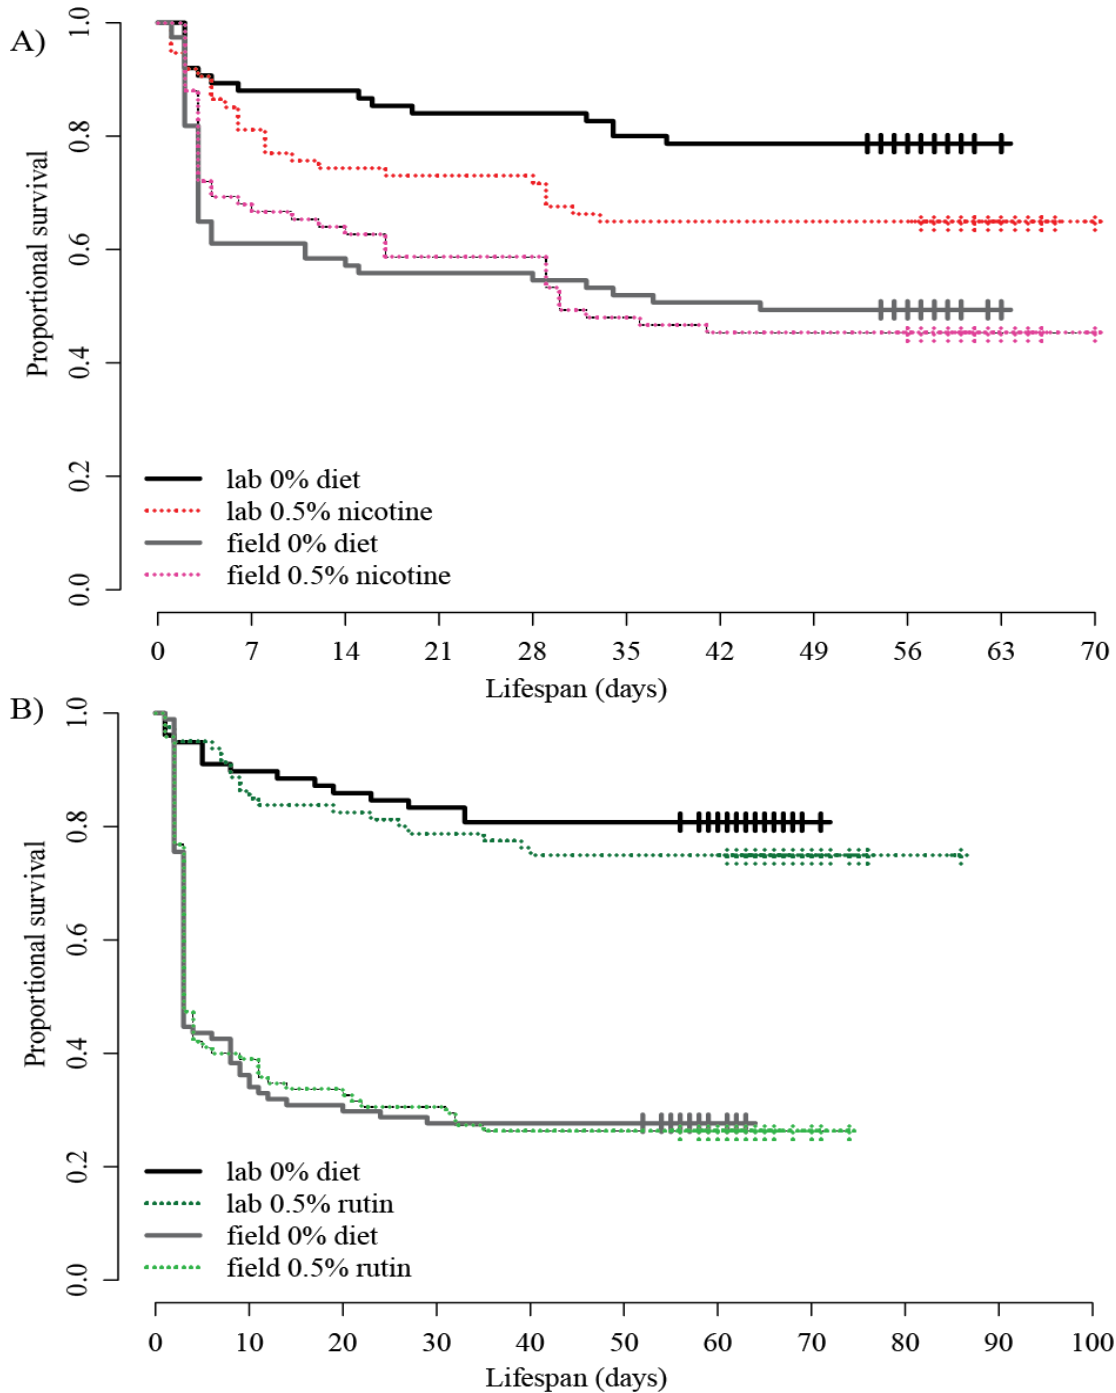

768

769 **Figure 3.** *Manduca sexta* adults had shorter wings when reared on larval diets containing  
770 secondary compounds. Males had shorter wings than females but there were no sex-specific  
771 effects of either compound (ANOVA  $P > 0.1$  for all sex-diet interactions). **A)** Nicotine (red)  
772 decreased wing length compared to control diets (grey) in both the lab (left pane, ANOVA  $P <$   
773  $0.01$ ) and field-collected colonies (right pane,  $P < 0.01$ ). **B)** Rutin (green) decreased wing length  
774 compared to control diets (grey) in both the lab (left pane,  $P < 0.01$ ) and field-collected colonies  
775 (right pane,  $P < 0.01$ ). Separate controls are presented for nicotine and rutin because the effects  
776 of these secondary compounds were tested at different generations.

777

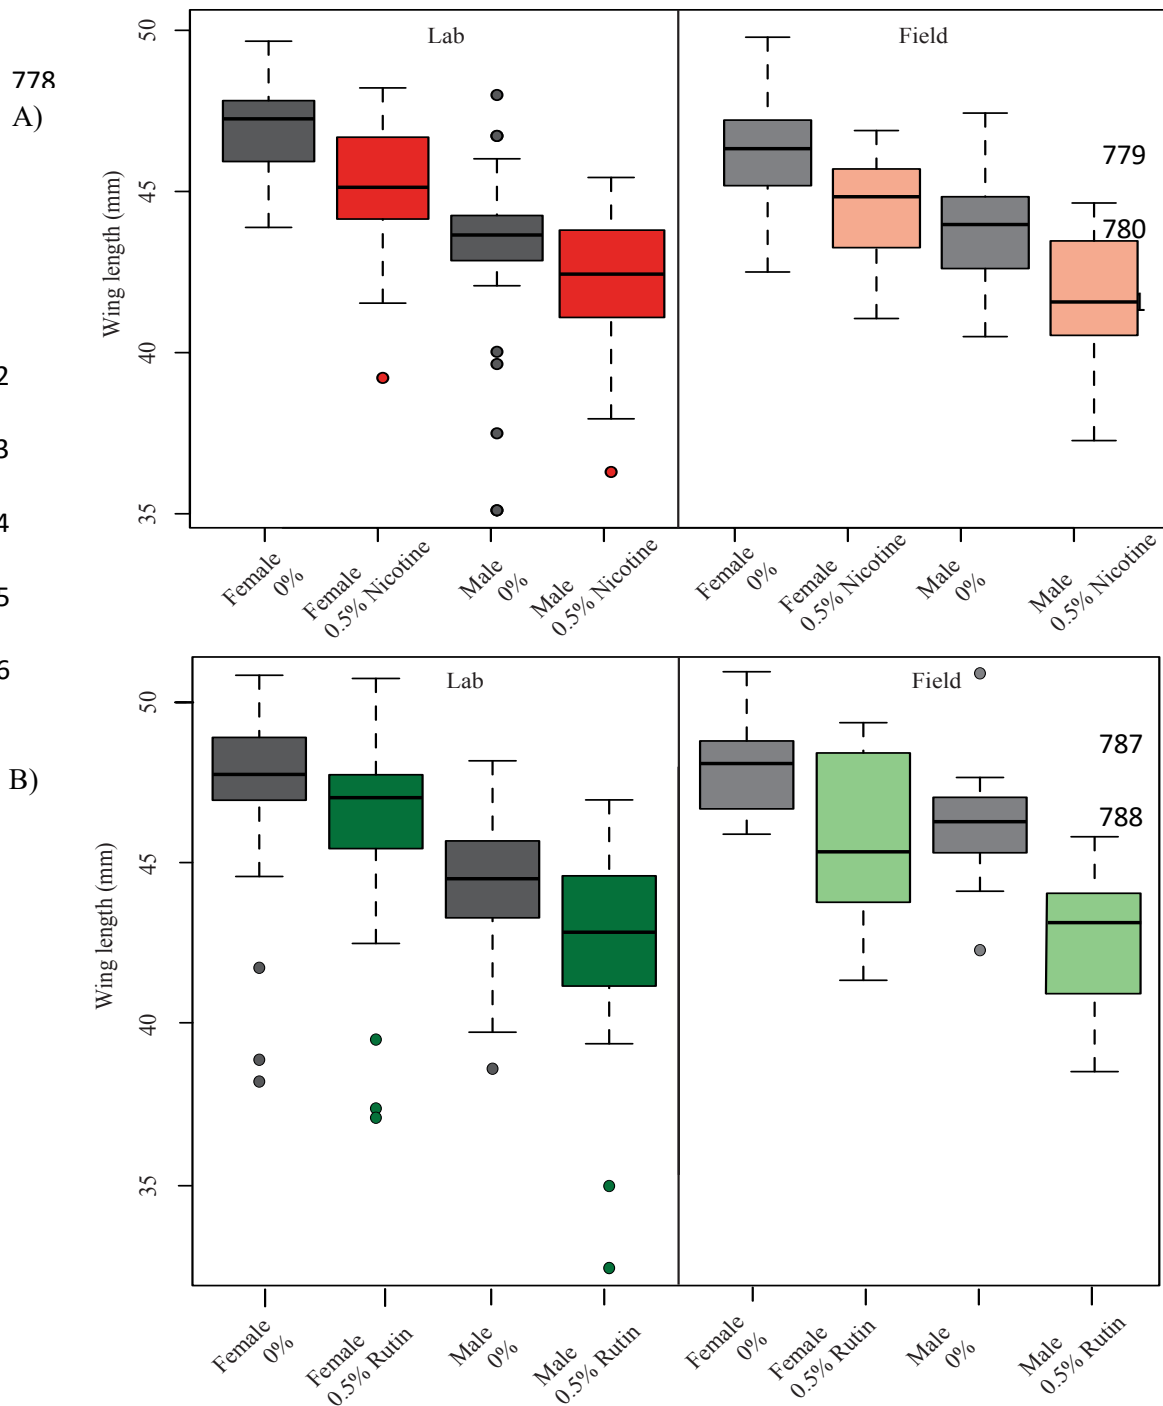

Source: https://www.biorxiv.org/content/10.1101/2021.01.13.426617v2.full.pdf
